# Supplementary material for: Radical allylations by reaction of azides with allylindium dichloride
Source: Royal Society of Chemistry journal article supplement (doi:10.1039/c001848a), 2010-01-01
Supplement: c001848a.pdf [file c001848a.pdf]

## Radical Allylations by Reaction of Azides with Allylindium Dichloride

**Giorgio Bencivenni, Tommaso Lanza, Matteo Minozzi, Daniele Nanni,\*  
Piero Spagnolo, and Giuseppe Zanardi**

*Dipartimento di Chimica Organica "A. Mangini", Università di Bologna,  
Viale Risorgimento 4, I-40136, Bologna, Italy.  
E-mail: nanni@ms.fci.unibo.it*

### Electronic Supplementary Information

#### Table of contents:

- Page 1: Calculation details, calculated values for the BDEs of tetraalkylstannanes, plot of calculated BDEs vs experimental values, calculated BDEs of allyltrimethylstannane and allylindium dichloride.
- Page 2: Reaction pathway and calculated energies for 1,5-H transfer of indium- or tin-substituted aminyl radicals.
- Page 3: Cartesian coordinates of all compounds, intermediates, and transition states.

All the structures were optimized both with DFT (B3LYP functional) and Hartree-Fock methods using the basis set LanL2DZ with Effective Core Potentials (ECP).<sup>1</sup>

All the structures were fully optimized and gave no imaginary frequencies.

|                                    | Me <sub>3</sub> Sn---Me | Me <sub>3</sub> Sn---Et | Me <sub>3</sub> Sn--- <sup>i</sup> Pr | Me <sub>3</sub> Sn--- <sup>t</sup> Bu |
|------------------------------------|-------------------------|-------------------------|---------------------------------------|---------------------------------------|
| <b>Experimental</b>                | 64.0                    | 60.0                    | 55.4                                  | 50.4                                  |
| <b>Theoretical DFT - [DEV (%)]</b> | 68.3 [6.7]              | 61.8 [3.0]              | 56.4 [1.8]                            | 52.5 [4.2]                            |
| <b>Theoretical HF - [DEV (%)]</b>  | 47.8 [25.3]             | 42.5 [29.2]             | 38.1 [31.2]                           | 34.6 [31.3]                           |

All values are expressed in Kcal / mol; DEV = deviation from the experimental value.<sup>2</sup>

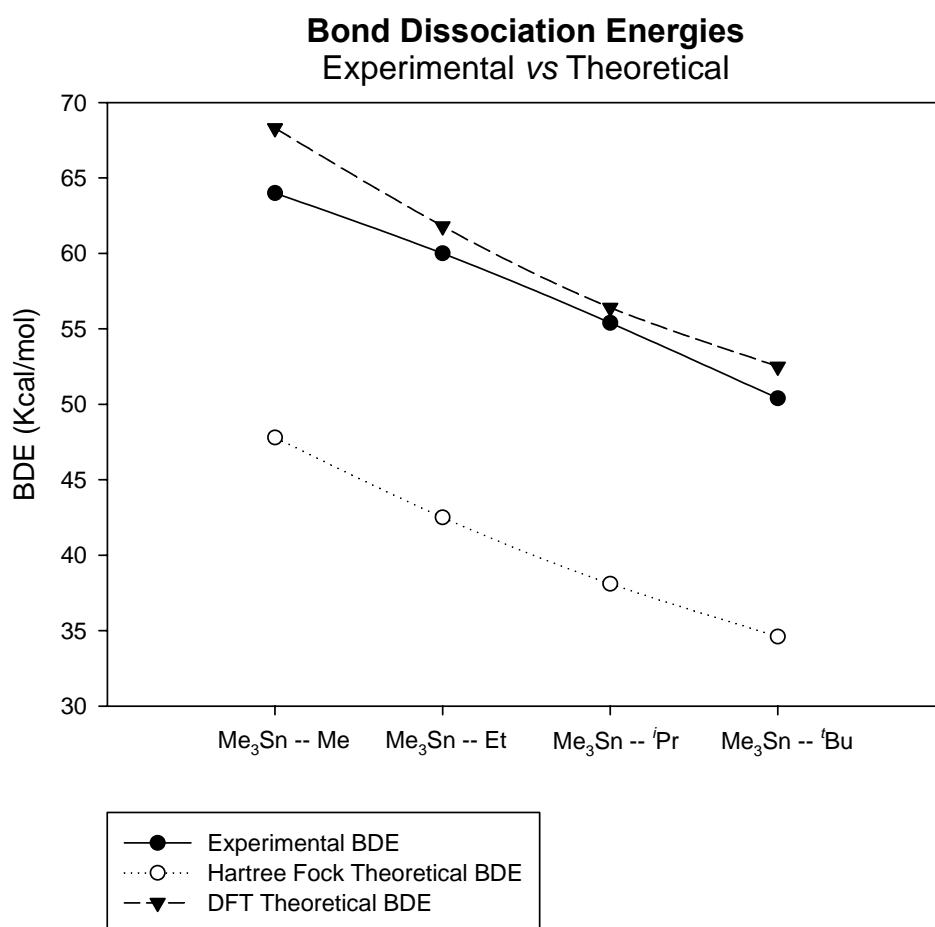

|                                                                        | DFT (B3LYP) | HF    |
|------------------------------------------------------------------------|-------------|-------|
| <b>BDE Me<sub>3</sub>Sn---allyl</b>                                    | 49.83       | 26.72 |
| <b>BDE Cl<sub>2</sub>In---allyl</b>                                    | 42.30       | 19.00 |
| <b>(BDE Me<sub>3</sub>Sn---allyl) – (BDE Cl<sub>2</sub>In---allyl)</b> | 7.53        | 7.72  |

All values are expressed in Kcal / mol

<sup>1</sup> (a) P. J. Hay and W. R. Wadt, *J. Chem. Phys.*, 1985, **82**, 270; (b) P. J. Hay and W. R. Wadt, *J. Chem. Phys.*, 1985, **82**, 284; (c) P. J. Hay and W. R. Wadt, *J. Chem. Phys.*, 1985, **82**, 299.

<sup>2</sup> Y.-r. Luo, *Handbook of Bond Dissociation Energies in Organic Compounds*, CRC Press: Boca Raton, 2003, p. 297.

Reaction pathway for 1,5-H transfer of aminyl radicals and calculated energies for intermediates and transition states

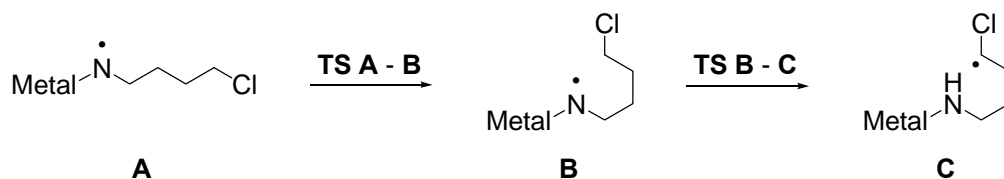

| Metal | Method      | $\Delta H$ (A – B) | $E_a$ (A – B) | $\Delta H$ (B – C) | $E_a$ (B – C) |
|-------|-------------|--------------------|---------------|--------------------|---------------|
| Sn    | DFT (B3LYP) | -0.2               | 1.9           | 0.6                | 10.8          |
|       | HF          | 0.2                | 2.5           | 2.6                | 29.6          |
| In    | DFT (B3LYP) | 0.8                | 2.2           | -4.9               | 8.0           |
|       | HF          | 1.5                | 2.7           | -2.6               | 26.0          |

All values are expressed in Kcal / mol

All the structures were optimized both with spin-unrestricted DFT (B3LYP functional) and Hartree-Fock methods using the basis set LanL2DZ with Effective Core Potentials (ECP). Energies were adjusted for zeropoint vibrational energies and for thermal corrections to 298 K. Computed  $\langle S^2 \rangle$  values were in the range 0.7539-0.7599 before annihilation and 0.7500 after annihilation of higher multiplicity spin states. Minima were localized by full optimization of the starting structures, while the transition states were located by a full transition state search. The optimized calculations were confirmed to be either ground or transition states by performing harmonic vibration frequency analyses (no imaginary frequencies were found for intermediates, whereas all the transition states were characterized by a unique imaginary frequency corresponding to the desired process).

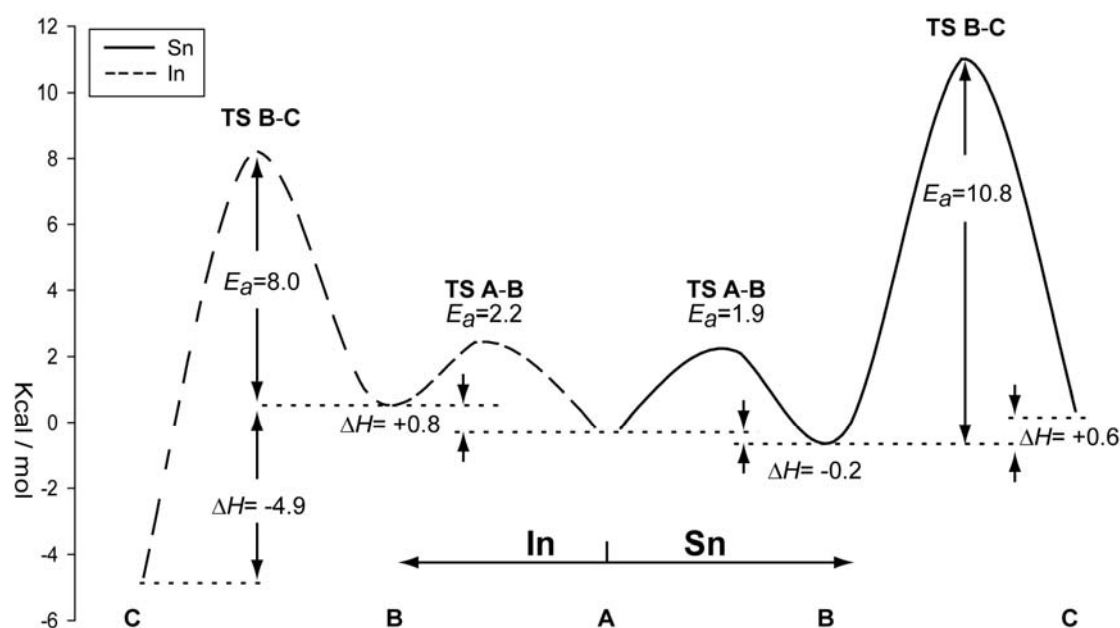

Reaction profiles for 1,5-H shift of tin- and indium-aminyls (DFT, UB3LYP, LanL2DZ ECP)

*Cartesian coordinates of all compounds and intermediates involved in BDEs calculations*

**Density Functional Theory - B3LYP / LanL2DZ ECP**

**Tetramethylstannane – B3LYP / LanL2DZ ECP**

Sum of electronic and thermal Enthalpies = -162.872147

|    |             |             |             |
|----|-------------|-------------|-------------|
| Sn | 0.00001200  | 0.00002700  | -0.00005100 |
| C  | 0.00992600  | -1.73792600 | 1.26205700  |
| H  | 0.02766800  | -2.65549800 | 0.65935800  |
| H  | 0.89267600  | -1.74055800 | 1.91489600  |
| H  | -0.88519200 | -1.76340700 | 1.89733300  |
| C  | -0.02701200 | 1.77042800  | 1.21580600  |
| H  | 0.85541300  | 1.80890100  | 1.86795000  |
| H  | -0.02864500 | 2.67202300  | 0.58920400  |
| H  | -0.92252500 | 1.79363200  | 1.85060500  |
| C  | -1.74589300 | -0.03494200 | -1.25060900 |
| H  | -1.77372300 | 0.84559100  | -1.90584800 |
| H  | -1.75432300 | -0.93226800 | -1.88321000 |
| H  | -2.65966200 | -0.03716500 | -0.64190700 |
| C  | 1.76293700  | 0.00230800  | -1.22700600 |
| H  | 1.78049100  | 0.88296200  | -1.88241700 |
| H  | 1.79921900  | -0.89488100 | -1.85879600 |
| H  | 2.66826100  | 0.02009100  | -0.60609500 |

**Ethyltrimethylstannane – B3LYP / LanL2DZ ECP**

Sum of electronic and thermal Enthalpies = -202.142764

|    |             |             |             |
|----|-------------|-------------|-------------|
| Sn | -0.27866500 | -0.00000400 | 0.00445000  |
| C  | -0.42824900 | 1.75780800  | -1.22323800 |
| H  | -0.36065000 | 2.66744700  | -0.61206900 |
| H  | 0.37725200  | 1.78510400  | -1.96872200 |
| H  | -1.38750600 | 1.77562700  | -1.75714100 |
| C  | -0.42709700 | -1.74482700 | -1.24175100 |

|   |             |             |             |
|---|-------------|-------------|-------------|
| H | 0.37822800  | -1.76372100 | -1.98768800 |
| H | -0.35874200 | -2.66082500 | -0.64024100 |
| H | -1.38646100 | -1.75771300 | -1.77561400 |
| C | -1.88279700 | -0.00823100 | 1.43490200  |
| H | -1.83351500 | -0.90140000 | 2.07155000  |
| H | -1.83288200 | 0.87701800  | 2.08245900  |
| H | -2.85576000 | -0.00476100 | 0.92607300  |
| C | 1.61912600  | -0.00465500 | 1.03223800  |
| H | 1.65432000  | -0.88797900 | 1.68800200  |
| H | 1.65445900  | 0.87289700  | 1.69569800  |
| C | 2.84856100  | -0.00057900 | 0.08617600  |
| H | 2.85747000  | 0.88840500  | -0.55972600 |
| H | 3.79182000  | -0.00250200 | 0.65156200  |
| H | 2.85795700  | -0.88448800 | -0.56662500 |

**iso-Propyltrimethylstannane – B3LYP / LanL2DZ ECP**

Sum of electronic and thermal Enthalpies = -241.416699

|    |             |             |             |
|----|-------------|-------------|-------------|
| Sn | -0.45647500 | 0.00005100  | -0.00457700 |
| C  | -0.64590700 | -0.00194000 | 2.13773400  |
| H  | -0.17570700 | -0.89297900 | 2.57376400  |
| H  | -0.17223300 | 0.88621400  | 2.57588300  |
| H  | -1.70513300 | -0.00021100 | 2.42716100  |
| C  | -1.41484500 | 1.75556000  | -0.79356800 |
| H  | -0.97516200 | 2.66672300  | -0.36698800 |
| H  | -1.30891000 | 1.80233400  | -1.88546100 |
| H  | -2.48666500 | 1.75078900  | -0.55501000 |
| C  | -1.41563200 | -1.75377300 | -0.79637200 |
| H  | -1.30996700 | -1.79885800 | -1.88835900 |
| H  | -0.97625800 | -2.66580200 | -0.37132800 |
| H  | -2.48740100 | -1.74892000 | -0.55756400 |
| C  | 1.64445000  | 0.00008500  | -0.55000300 |

|   |            |             |             |
|---|------------|-------------|-------------|
| H | 1.67864300 | 0.00034800  | -1.65224200 |
| C | 2.36535400 | 1.27764800  | -0.04666400 |
| H | 2.34781200 | 1.34149300  | 1.05121300  |
| H | 3.42317000 | 1.27978100  | -0.35420500 |
| H | 1.90498700 | 2.19342200  | -0.44310200 |
| C | 2.36514300 | -1.27781300 | -0.04723600 |
| H | 1.90455700 | -2.19335400 | -0.44396300 |
| H | 3.42292700 | -1.28007000 | -0.35488500 |
| H | 2.34769600 | -1.34206500 | 1.05061500  |

***tert*-Butyltrimethylstannane – B3LYP / LanL2DZ ECP**

Sum of electronic and thermal Enthalpies = -280.692784

|    |             |             |             |
|----|-------------|-------------|-------------|
| Sn | 0.60574100  | 0.00043300  | -0.00088700 |
| C  | 1.33149400  | -0.53600100 | 1.95086900  |
| H  | 0.97691200  | 0.17183300  | 2.71150300  |
| H  | 0.99489900  | -1.54198100 | 2.23378700  |
| H  | 2.42948200  | -0.52826900 | 1.96518900  |
| C  | 1.33593700  | -1.42341500 | -1.43683300 |
| H  | 0.99286700  | -2.43778800 | -1.19446400 |
| H  | 0.98969000  | -1.17567200 | -2.44874200 |
| H  | 2.43402900  | -1.42875800 | -1.44473100 |
| C  | 1.34073700  | 1.95707600  | -0.50813700 |
| H  | 0.99696200  | 2.26123300  | -1.50548800 |
| H  | 0.99598000  | 2.70538800  | 0.21739100  |
| H  | 2.43887300  | 1.96578600  | -0.50952500 |
| C  | -1.57878500 | 0.00125800  | -0.00182100 |
| C  | -2.09875200 | -1.41052000 | 0.38171800  |
| H  | -1.76550700 | -1.71032500 | 1.38555800  |
| H  | -3.20204700 | -1.42488200 | 0.38497200  |
| H  | -1.76540200 | -2.17966800 | -0.32958000 |
| C  | -2.10582600 | 1.03416300  | 1.02924100  |

|   |             |             |             |
|---|-------------|-------------|-------------|
| H | -1.77295100 | 2.05605700  | 0.79542100  |
| H | -3.20969300 | 1.04232700  | 1.03324500  |
| H | -1.77763000 | 0.79593300  | 2.05165900  |
| C | -2.10567000 | 0.37596600  | -1.41221700 |
| H | -1.77670300 | -0.34224400 | -2.17744200 |
| H | -3.20955800 | 0.38071600  | -1.41985000 |
| H | -1.77207400 | 1.37748700  | -1.72146900 |

#### **Methyl radical – B3LYP / LanL2DZ ECP**

Sum of electronic and thermal Enthalpies = -39.80344

|   |             |             |             |
|---|-------------|-------------|-------------|
| C | 0.00000000  | 0.00000000  | 0.00001300  |
| H | 0.00000000  | 1.08612500  | -0.00002600 |
| H | 0.94061200  | -0.54306200 | -0.00002600 |
| H | -0.94061200 | -0.54306200 | -0.00002600 |

#### **Ethyl radical – B3LYP / LanL2DZ ECP**

Sum of electronic and thermal Enthalpies = -79.084459

|   |             |             |             |
|---|-------------|-------------|-------------|
| C | -0.80220500 | 0.00000000  | -0.01212900 |
| H | -1.36203600 | -0.93199800 | 0.02805600  |
| H | -1.36203600 | 0.93199800  | 0.02805600  |
| C | 0.70198400  | 0.00000000  | -0.00211600 |
| H | 1.11029400  | 0.89014600  | -0.49920200 |
| H | 1.10480800  | 0.00000000  | 1.02776700  |
| H | 1.11029400  | -0.89014600 | -0.49920300 |

#### **iso-Propyl radical – B3LYP / LanL2DZ ECP**

Sum of electronic and thermal Enthalpies = -118.366965

|   |             |             |             |
|---|-------------|-------------|-------------|
| C | 0.00000000  | 0.54308000  | -0.01786900 |
| H | -0.00001100 | 1.63004000  | 0.04252100  |
| C | 1.30933100  | -0.20120600 | 0.00108500  |
| H | 2.16614700  | 0.47427100  | -0.10835600 |

|   |             |             |             |
|---|-------------|-------------|-------------|
| H | 1.44767000  | -0.76316800 | 0.94297000  |
| H | 1.35985900  | -0.94811400 | -0.80877200 |
| C | -1.30933200 | -0.20121500 | 0.00107900  |
| H | -2.16610500 | 0.47419300  | -0.10911000 |
| H | -1.35953500 | -0.94863200 | -0.80831300 |
| H | -1.44802000 | -0.76254400 | 0.94328600  |

**tert-Butyl radical – B3LYP / LanL2DZ ECP**

Sum of electronic and thermal Enthalpies = -157.649383

|   |             |             |             |
|---|-------------|-------------|-------------|
| C | 0.00165400  | -0.00011200 | -0.13508700 |
| C | -0.81452400 | -1.26293400 | 0.01422600  |
| H | -0.31530900 | -2.12409700 | -0.45142500 |
| H | -0.98002200 | -1.52920400 | 1.07696800  |
| H | -1.80906200 | -1.15646000 | -0.44123000 |
| C | -0.68860200 | 1.33535900  | 0.01437900  |
| H | -0.06688600 | 2.15735500  | -0.36596300 |
| H | -1.64776800 | 1.35579600  | -0.52283700 |
| H | -0.91600300 | 1.57055000  | 1.07275900  |
| C | 1.50309400  | -0.07253300 | 0.01439900  |
| H | 1.99995900  | 0.76850000  | -0.48986500 |
| H | 1.81939800  | -0.03480800 | 1.07554900  |
| H | 1.90596100  | -1.00631000 | -0.40145800 |

**Trimethylstannyl radical – B3LYP / LanL2DZ ECP**

Sum of electronic and thermal Enthalpies = -122.959794

|    |             |             |             |
|----|-------------|-------------|-------------|
| Sn | 0.00000000  | 0.00000000  | 0.29063200  |
| C  | 0.00000000  | 2.02317500  | -0.49054100 |
| H  | 0.00000000  | 1.99057600  | -1.58914700 |
| H  | -0.89014800 | 2.56944200  | -0.15573400 |
| H  | 0.89014800  | 2.56944200  | -0.15573400 |
| C  | 1.75212100  | -1.01158800 | -0.49054100 |



|   |             |             |             |
|---|-------------|-------------|-------------|
| H | 2.67027600  | -0.51383000 | -0.15573400 |
| H | 1.78012800  | -2.05561200 | -0.15573400 |
| H | 1.72388900  | -0.99528800 | -1.58914700 |
| C | -1.75212100 | -1.01158800 | -0.49054100 |
| H | -1.78012800 | -2.05561200 | -0.15573400 |
| H | -2.67027600 | -0.51383000 | -0.15573400 |
| H | -1.72388900 | -0.99528800 | -1.58914700 |

### Allyltrimethylstannane – B3LYP / LanL2DZ ECP

Sum of electronic and thermal Enthalpies = -240.213954

|    |             |             |             |
|----|-------------|-------------|-------------|
| Sn | -0.51728900 | 0.01460600  | -0.01184200 |
| C  | -2.19264000 | 0.15222900  | 1.32650800  |
| H  | -3.12103200 | 0.32874700  | 0.76761200  |
| H  | -2.31043200 | -0.77577300 | 1.90105700  |
| H  | -2.05761700 | 0.97990600  | 2.03494000  |
| C  | -0.31914800 | 1.82367200  | -1.14454900 |
| H  | -0.35595700 | 2.70209300  | -0.48733600 |
| H  | 0.63955000  | 1.83236800  | -1.67808000 |
| H  | -1.12700900 | 1.91328400  | -1.88230200 |
| C  | -0.77125900 | -1.66061700 | -1.32964400 |
| H  | 0.06799700  | -1.73111600 | -2.03321700 |
| H  | -0.82730100 | -2.59970400 | -0.76383300 |
| H  | -1.69684200 | -1.55681200 | -1.91084400 |
| C  | 1.29494900  | -0.26899200 | 1.15945500  |
| H  | 1.45135200  | 0.63924200  | 1.75753900  |
| H  | 1.10811700  | -1.10008800 | 1.85492000  |
| C  | 2.48623900  | -0.55655600 | 0.28567800  |
| H  | 2.53702000  | -1.56663600 | -0.13017500 |
| C  | 3.46709900  | 0.31663300  | -0.04359500 |
| H  | 3.48198100  | 1.33509600  | 0.34205300  |
| H  | 4.28317000  | 0.03085300  | -0.70334700 |

### Allylindium dichloride – B3LYP / LanL2DZ ECP

Sum of electronic and thermal Enthalpies = -149.096535

|    |             |             |             |
|----|-------------|-------------|-------------|
| C  | 1.73974200  | -0.18794100 | 0.99642700  |
| H  | 2.01181100  | 0.77838000  | 1.43414800  |
| H  | 1.72225500  | -0.95245300 | 1.78073900  |
| C  | 2.63691300  | -0.57420300 | -0.15342000 |
| H  | 2.64140700  | -1.63217000 | -0.42209800 |
| C  | 3.41550300  | 0.27897800  | -0.85926400 |
| H  | 3.45949200  | 1.34338900  | -0.63397400 |
| H  | 4.04003800  | -0.07552900 | -1.67512800 |
| In | -0.25072500 | -0.00253600 | 0.22492400  |
| Cl | -1.26720200 | 2.08393500  | -0.27796800 |
| Cl | -1.57647100 | -1.87442600 | -0.39305600 |

### Allyl radical – B3LYP / LanL2DZ ECP

Sum of electronic and thermal Enthalpies = -117.174750

|   |            |             |             |
|---|------------|-------------|-------------|
| C | 0.00000000 | 1.24313300  | -0.19833200 |
| H | 0.00000000 | 2.17389800  | 0.36291600  |
| H | 0.00000000 | 1.31276500  | -1.28474800 |
| C | 0.00000000 | 0.00000000  | 0.44738500  |
| H | 0.00000000 | 0.00000000  | 1.53934200  |
| C | 0.00000000 | -1.24313300 | -0.19833200 |
| H | 0.00000000 | -1.31276500 | -1.28474800 |
| H | 0.00000000 | -2.17389800 | 0.36291600  |

### Dichloroindium radical – B3LYP / LanL2DZ ECP

Sum of electronic and thermal Enthalpies = -31.854381

|    |            |             |             |
|----|------------|-------------|-------------|
| In | 0.00000000 | 0.00000000  | 0.49848800  |
| Cl | 0.00000000 | 2.08300200  | -0.71840900 |
| Cl | 0.00000000 | -2.08300200 | -0.71840900 |

*Cartesian coordinates of all compounds and intermediates involved in BDEs calculations*

**Hartree-Fock - HF / LanL2DZ ECP**

**Tetramethylstannane – HF / LanL2DZ**

Sum of electronic and thermal Enthalpies = -161.502607 (Hartree/Particle)

|    |             |             |             |
|----|-------------|-------------|-------------|
| Sn | 0.00000600  | 0.00001000  | -0.00001600 |
| C  | 0.01567300  | -1.73533100 | 1.25287200  |
| H  | 0.03383000  | -2.64192400 | 0.65512600  |
| H  | 0.88997200  | -1.73814900 | 1.89715400  |
| H  | -0.86831200 | -1.76412800 | 1.88314800  |
| C  | -0.03036300 | 1.76032700  | 1.21724700  |
| H  | 0.84345600  | 1.79934200  | 1.86100600  |
| H  | -0.03606100 | 2.65473100  | 0.60117300  |
| H  | -0.91490000 | 1.77858900  | 1.84714300  |
| C  | -1.74060000 | -0.03564200 | -1.24516000 |
| H  | -1.77092000 | 0.83696500  | -1.89102600 |
| H  | -1.74729400 | -0.92132300 | -1.87367400 |
| H  | -2.64466900 | -0.04185100 | -0.64336200 |
| C  | 1.75526600  | 0.01060100  | -1.22488900 |
| H  | 1.76971600  | 0.88355000  | -1.87084200 |
| H  | 1.79288900  | -0.87473700 | -1.85279500 |
| H  | 2.65215800  | 0.02870500  | -0.61268300 |

**Ethyltrimethylstannane – HF / LanL2DZ**

Sum of electronic and thermal Enthalpies = -200.486345 (Hartree/Particle)

|    |             |             |             |
|----|-------------|-------------|-------------|
| Sn | 0.27790600  | 0.00355400  | -0.00000200 |
| C  | 0.43806300  | -1.22715500 | 1.74567900  |
| H  | 0.33060900  | -0.63272500 | 2.64828400  |
| H  | -0.33025900 | -1.99459300 | 1.75180800  |
| H  | 1.40578200  | -1.71926300 | 1.77880300  |
| C  | 0.43799300  | -1.22816800 | -1.74497400 |

|   |             |             |             |
|---|-------------|-------------|-------------|
| H | -0.33022200 | -1.99571800 | -1.75053400 |
| H | 0.33032700  | -0.63429200 | -2.64791800 |
| H | 1.40577700  | -1.72016000 | -1.77794200 |
| C | 1.86037600  | 1.44575000  | -0.00044700 |
| H | 1.80398100  | 2.08024100  | -0.88013700 |
| H | 1.80386600  | 2.08091300  | 0.87875000  |
| H | 2.82901900  | 0.95443500  | -0.00019600 |
| C | -1.61602800 | 1.01844000  | -0.00026100 |
| H | -1.65126500 | 1.67006400  | -0.87074100 |
| H | -1.65126200 | 1.67051200  | 0.86988400  |
| C | -2.84593600 | 0.08053300  | -0.00001600 |
| H | -2.85800200 | -0.56005900 | 0.87677300  |
| H | -3.77246300 | 0.64706400  | -0.00015900 |
| H | -2.85800800 | -0.56050900 | -0.87647700 |

***iso*-Propyltrimethylstannane – HF / LanL2DZ**

Sum of electronic and thermal Enthalpies = -239.473026 (Hartree/Particle)

|    |             |             |             |
|----|-------------|-------------|-------------|
| Sn | -0.45534800 | 0.00000100  | -0.00316700 |
| C  | -0.65816600 | -0.00028800 | 2.12997900  |
| H  | -0.19415800 | -0.88035700 | 2.56525800  |
| H  | -0.19352800 | 0.87929700  | 2.56556400  |
| H  | -1.70766900 | 0.00004000  | 2.41030200  |
| C  | -1.40812900 | 1.74542900  | -0.79924800 |
| H  | -0.99057600 | 2.64937700  | -0.36586500 |
| H  | -1.28308100 | 1.79708400  | -1.87698600 |
| H  | -2.47277900 | 1.73001600  | -0.58416400 |
| C  | -1.40822300 | -1.74515500 | -0.79973400 |
| H  | -1.28335200 | -1.79640200 | -1.87751200 |
| H  | -0.99057100 | -2.64925400 | -0.36676000 |
| H  | -2.47283700 | -1.72985400 | -0.58446600 |
| C  | 1.63635400  | 0.00000500  | -0.54019600 |

|   |            |             |             |
|---|------------|-------------|-------------|
| H | 1.66778600 | 0.00000000  | -1.62911000 |
| C | 2.36429100 | 1.27145300  | -0.04464700 |
| H | 2.35605000 | 1.33597100  | 1.04027100  |
| H | 3.40555500 | 1.26643500  | -0.35932500 |
| H | 1.91125500 | 2.17816600  | -0.43447700 |
| C | 2.36428500 | -1.27144300 | -0.04463600 |
| H | 1.91124400 | -2.17815800 | -0.43445700 |
| H | 3.40554800 | -1.26643500 | -0.35931700 |
| H | 2.35604400 | -1.33595000 | 1.04028200  |

***tert*-Butyltrimethylstannane – HF / LanL2DZ**

Sum of electronic and thermal Enthalpies = -278.461693 (Hartree/Particle)

|    |             |             |             |
|----|-------------|-------------|-------------|
| Sn | -0.60311900 | -0.00000100 | -0.00001300 |
| C  | -1.33570400 | -1.35832200 | -1.48620100 |
| H  | -0.99510100 | -1.07433100 | -2.47748300 |
| H  | -0.99985400 | -2.37202100 | -1.28890900 |
| H  | -2.42209200 | -1.35972100 | -1.49209000 |
| C  | -1.33548800 | -0.60793600 | 1.91950300  |
| H  | -0.99698400 | -1.60944200 | 2.16791700  |
| H  | -0.99738300 | 0.06822300  | 2.69911600  |
| H  | -2.42187900 | -0.60982000 | 1.92462300  |
| C  | -1.33535600 | 1.96638600  | -0.43318200 |
| H  | -0.99564200 | 2.68250900  | 0.30915500  |
| H  | -0.99849200 | 2.30293300  | -1.40917200 |
| H  | -2.42175000 | 1.97207000  | -0.43262800 |
| C  | 1.57034500  | -0.00006500 | -0.00001800 |
| C  | 2.10033800  | -1.42064700 | 0.31168900  |
| H  | 1.77482600  | -2.14633800 | -0.42830100 |
| H  | 3.18972900  | -1.42404000 | 0.31243000  |
| H  | 1.77484300  | -1.76985400 | 1.28753900  |
| C  | 2.10025500  | 0.44033400  | -1.38616100 |

|   |            |             |             |
|---|------------|-------------|-------------|
| H | 1.77476000 | 1.44404500  | -1.64458800 |
| H | 3.18964600 | 0.44135800  | -1.38953900 |
| H | 1.77469000 | -0.23015300 | -2.17649300 |
| C | 2.10021800 | 0.98022900  | 1.07441700  |
| H | 1.77464600 | 0.70221900  | 2.07285400  |
| H | 3.18960900 | 0.98260000  | 1.07706000  |
| H | 1.77470600 | 1.99992600  | 0.88886700  |

### **Methyl radical – HF / LanL2DZ**

Sum of electronic and thermal Enthalpies = -39.517258 (Hartree/Particle)

|   |             |             |             |
|---|-------------|-------------|-------------|
| C | 0.00000000  | 0.00000000  | 0.00001200  |
| H | 0.00000000  | 1.07410800  | -0.00002300 |
| H | 0.93020500  | -0.53705400 | -0.00002300 |
| H | -0.93020500 | -0.53705400 | -0.00002300 |

### **Ethyl radical – HF / LanL2DZ**

Sum of electronic and thermal Enthalpies = -78.509378 (Hartree/Particle)

|   |             |             |             |
|---|-------------|-------------|-------------|
| C | -0.00937600 | 0.80348200  | 0.00000000  |
| H | 0.06409900  | 1.35478300  | 0.92075300  |
| H | 0.06409900  | 1.35478300  | -0.92075300 |
| C | -0.00937600 | -0.70468900 | 0.00000000  |
| H | -0.50990400 | -1.09890900 | -0.87769300 |
| H | 1.00412200  | -1.10450500 | 0.00000000  |
| H | -0.50990400 | -1.09890900 | 0.87769300  |

### **iso-Propyl radical – HF / LanL2DZ**

Sum of electronic and thermal Enthalpies = -117.50317 (Hartree/Particle)

|   |            |             |             |
|---|------------|-------------|-------------|
| C | 0.00000000 | 0.54414700  | -0.05724800 |
| H | 0.00000400 | 1.60517700  | 0.12828400  |
| C | 1.31015600 | -0.20356400 | 0.00564700  |
| H | 2.14883000 | 0.44227700  | -0.22833500 |

|   |             |             |             |
|---|-------------|-------------|-------------|
| H | 1.48586100  | -0.62210400 | 0.99740400  |
| H | 1.32002200  | -1.03382200 | -0.69534900 |
| C | -1.31015700 | -0.20356200 | 0.00564800  |
| H | -2.14885100 | 0.44233100  | -0.22811500 |
| H | -1.32010900 | -1.03368400 | -0.69551000 |
| H | -1.48575200 | -0.62229800 | 0.99734100  |

**tert-Butyl radical – HF / LanL2DZ**

Sum of electronic and thermal Enthalpies = -156.497342 (Hartree/Particle)

|   |             |             |             |
|---|-------------|-------------|-------------|
| C | 0.00000500  | -0.00000300 | -0.18943000 |
| C | 1.47712500  | -0.25335100 | 0.02198800  |
| H | 2.08020900  | 0.53398900  | -0.41864000 |
| H | 1.72706200  | -0.29618600 | 1.08415800  |
| H | 1.78336800  | -1.19668600 | -0.41858400 |
| C | -0.95797300 | -1.15254600 | 0.02198800  |
| H | -1.92803300 | -0.94609300 | -0.41861400 |
| H | -0.57765500 | -2.06851500 | -0.41861100 |
| H | -1.12006500 | -1.34755500 | 1.08415800  |
| C | -0.51915400 | 1.40589900  | 0.02198800  |
| H | -1.50255700 | 1.53450600  | -0.41863200 |
| H | -0.60701600 | 1.64376700  | 1.08415800  |
| H | 0.14467000  | 2.14278000  | -0.41859300 |

**Trimethylstannyl radical – HF / LanL2DZ**

Sum of electronic and thermal Enthalpies = -121.909186 (Hartree/Particle)

|    |             |             |             |
|----|-------------|-------------|-------------|
| Sn | 0.00000000  | 0.00000000  | 0.28531900  |
| C  | 0.00000000  | 2.01357200  | -0.48183700 |
| H  | 0.00000000  | 1.99231300  | -1.56814100 |
| H  | -0.87930100 | 2.55487600  | -0.14807800 |
| H  | 0.87930100  | 2.55487600  | -0.14807800 |
| C  | 1.74380400  | -1.00678600 | -0.48183700 |

|   |             |             |             |
|---|-------------|-------------|-------------|
| H | 2.65223800  | -0.51594100 | -0.14807800 |
| H | 1.77293700  | -2.03893500 | -0.14807800 |
| H | 1.72539400  | -0.99615600 | -1.56814100 |
| C | -1.74380400 | -1.00678600 | -0.48183700 |
| H | -1.77293700 | -2.03893500 | -0.14807800 |
| H | -2.65223800 | -0.51594100 | -0.14807800 |
| H | -1.72539400 | -0.99615600 | -1.56814100 |

### Allyltrimethylstannane – HF / LanL2DZ

Sum of electronic and thermal Enthalpies = -238.317223 (Hartree/Particle)

|    |             |             |             |
|----|-------------|-------------|-------------|
| Sn | -0.51536600 | 0.01400700  | -0.01039700 |
| C  | -2.16897200 | 0.10079500  | 1.34576500  |
| H  | -3.09844700 | 0.26383900  | 0.80815900  |
| H  | -2.25979400 | -0.82646000 | 1.90367200  |
| H  | -2.04342000 | 0.91262200  | 2.05606400  |
| C  | -0.37273100 | 1.84113300  | -1.10945800 |
| H  | -0.32231700 | 2.69252600  | -0.43740000 |
| H  | 0.51810700  | 1.84426800  | -1.72915300 |
| H  | -1.23699300 | 1.97029700  | -1.75420200 |
| C  | -0.76762300 | -1.63252900 | -1.35322500 |
| H  | 0.05059800  | -1.67831200 | -2.06522600 |
| H  | -0.80075600 | -2.57292300 | -0.81109400 |
| H  | -1.69433500 | -1.53202000 | -1.91043200 |
| C  | 1.29919300  | -0.26783700 | 1.13006400  |
| H  | 1.45537300  | 0.62320000  | 1.73093000  |
| H  | 1.13066700  | -1.09450200 | 1.81556300  |
| C  | 2.49630300  | -0.54646800 | 0.26138800  |
| H  | 2.54821600  | -1.53830400 | -0.15883800 |
| C  | 3.47191800  | 0.31758200  | -0.04032600 |
| H  | 3.48696800  | 1.31973900  | 0.35029900  |
| H  | 4.28591300  | 0.03964100  | -0.68372500 |



### Allylindium dichloride – HF / LanL2DZ

Sum of electronic and thermal Enthalpies = -147.696511 (Hartree/Particle)

|    |             |             |             |
|----|-------------|-------------|-------------|
| C  | 1.72762100  | -0.16243900 | 0.97419900  |
| H  | 1.99022500  | 0.79326000  | 1.40891000  |
| H  | 1.72178800  | -0.91156600 | 1.75610700  |
| C  | 2.66565100  | -0.55050600 | -0.14351800 |
| H  | 2.67773100  | -1.59496400 | -0.40489500 |
| C  | 3.46044500  | 0.28925000  | -0.81474600 |
| H  | 3.50088800  | 1.34113400  | -0.59491200 |
| H  | 4.10388000  | -0.06375900 | -1.59786400 |
| In | -0.25005000 | -0.00185000 | 0.20336900  |
| Cl | -1.30638800 | 2.04626800  | -0.26145800 |
| Cl | -1.56798700 | -1.86575600 | -0.36372100 |

### Allyl radical – HF / LanL2DZ

Sum of electronic and thermal Enthalpies = -116.365462 (Hartree/Particle)

|   |            |             |             |
|---|------------|-------------|-------------|
| C | 0.00000000 | 1.24274300  | -0.20017500 |
| H | 0.00000000 | 2.16289700  | 0.35349000  |
| H | 0.00000000 | 1.31071900  | -1.27342900 |
| C | 0.00000000 | 0.00000000  | 0.45222900  |
| H | 0.00000000 | 0.00000000  | 1.52859700  |
| C | 0.00000000 | -1.24274300 | -0.20017500 |
| H | 0.00000000 | -1.31071900 | -1.27342900 |
| H | 0.00000000 | -2.16289700 | 0.35349000  |

### Dichloroindium radical – HF / LanL2DZ

Sum of electronic and thermal Enthalpies = -31.300777 (Hartree/Particle)

|    |            |             |             |
|----|------------|-------------|-------------|
| In | 0.00000000 | 0.00000000  | 0.51168200  |
| Cl | 0.00000000 | 2.02385700  | -0.73742300 |
| Cl | 0.00000000 | -2.02385700 | -0.73742300 |

*Cartesian coordinates and optimized geometries of all intermediates and transition states  
involved in 1,5-H shift of metal-aminyll radicals*

**Density Functional Theory - B3LYP / LanL2DZ ECP**

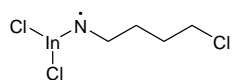

**A In B3LYP / LanL2DZ ECP**

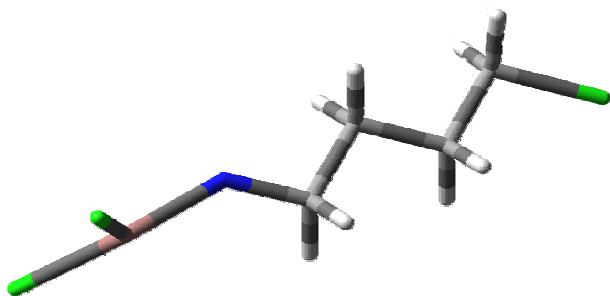

Sum of electronic and thermal Enthalpies = -258.608546 (Hartree/Particle)

|    |             |             |             |
|----|-------------|-------------|-------------|
| C  | 4.93460500  | 0.00020500  | 0.69515900  |
| H  | 4.98023300  | 0.89706400  | 1.31629000  |
| H  | 4.98046300  | -0.89612800 | 1.31703300  |
| C  | 3.73574800  | -0.00034500 | -0.25215100 |
| H  | 3.78846900  | 0.88301400  | -0.90330500 |
| H  | 3.78862000  | -0.88431500 | -0.90246300 |
| C  | 2.40339600  | -0.00008400 | 0.53609100  |
| H  | 2.34159900  | -0.88248400 | 1.18755000  |
| H  | 2.34150700  | 0.88289500  | 1.18676000  |
| C  | 1.18288400  | -0.00058100 | -0.40998600 |
| H  | 1.22811300  | 0.87698000  | -1.08342900 |
| H  | 1.22825400  | -0.87877400 | -1.08263200 |
| N  | -0.07222200 | -0.00051700 | 0.31829300  |
| In | -2.01344700 | -0.00004300 | -0.04819400 |
| Cl | -3.24980500 | -2.01050100 | 0.01572600  |
| Cl | -3.24853900 | 2.01121700  | 0.01561800  |
| Cl | 6.55407300  | 0.00000800  | -0.28528700 |

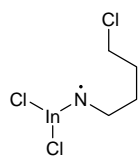

**B In B3LYP / LanL2DZ ECP**

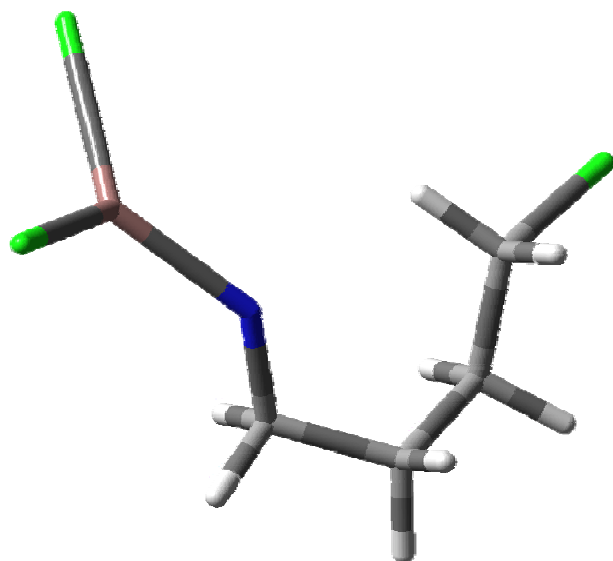

Sum of electronic and thermal Enthalpies = -258,60734 (Hartree/Particle)

|    |             |             |             |
|----|-------------|-------------|-------------|
| C  | -3.18206800 | 0.04820800  | -0.59839100 |
| H  | -2.27784700 | 0.62141500  | -0.39825200 |
| H  | -3.17510400 | -0.31749800 | -1.62682500 |
| C  | -3.43979600 | -1.06445400 | 0.41917000  |
| H  | -4.42296200 | -1.50616300 | 0.21158600  |
| H  | -3.49348500 | -0.63254800 | 1.42839800  |
| C  | -2.37122500 | -2.18639400 | 0.38304000  |
| H  | -2.74223200 | -3.02986100 | 0.98453200  |
| H  | -2.24284800 | -2.55629300 | -0.64368100 |
| C  | -0.98789900 | -1.78759900 | 0.94270700  |
| H  | -0.37955000 | -2.70166700 | 1.08747500  |
| H  | -1.10068600 | -1.35526300 | 1.95512000  |
| N  | -0.25395100 | -0.87612600 | 0.07642300  |
| In | 1.50466200  | 0.03988600  | 0.09089200  |
| Cl | 1.66762500  | 2.34318400  | 0.57536800  |
| Cl | 3.38473300  | -0.97460200 | -0.91552900 |
| Cl | -4.59530600 | 1.31363900  | -0.53432000 |

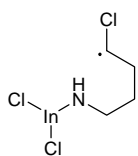

**C In B3LYP / LanL2DZ ECP**

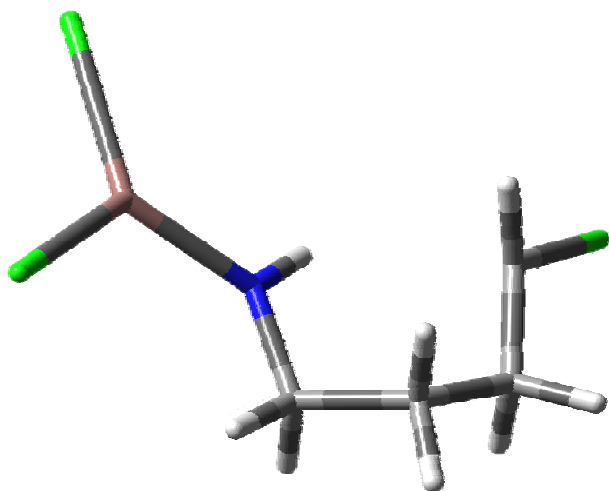

Sum of electronic and thermal Enthalpies = -258,615101 (Hartree/Particle)

|    |             |             |             |
|----|-------------|-------------|-------------|
| C  | -3.31152900 | 0.18096200  | -0.48441500 |
| H  | -2.82858400 | 0.55358500  | -1.38427800 |
| C  | -3.39191000 | -1.27711900 | -0.13596300 |
| H  | -4.18083300 | -1.75567000 | -0.74588000 |
| H  | -3.71178000 | -1.39003600 | 0.91029000  |
| C  | -2.05951500 | -2.03942800 | -0.36271700 |
| H  | -2.27055500 | -3.11576000 | -0.27845800 |
| H  | -1.68982000 | -1.86327800 | -1.38319800 |
| C  | -0.94344400 | -1.68931000 | 0.65010100  |
| H  | -0.12499500 | -2.41102300 | 0.53129800  |
| H  | -1.33592200 | -1.82293600 | 1.67142400  |
| N  | -0.39751900 | -0.31983600 | 0.49682400  |
| In | 1.43008200  | 0.15181000  | 0.08829900  |
| Cl | 2.15414000  | 2.38448900  | -0.11538700 |
| Cl | 3.01396200  | -1.56370100 | -0.26919400 |
| Cl | -4.68631900 | 1.24690300  | 0.04517900  |
| H  | -1.10081800 | 0.40388400  | 0.64219900  |

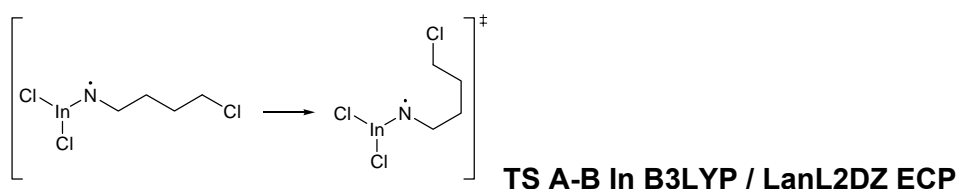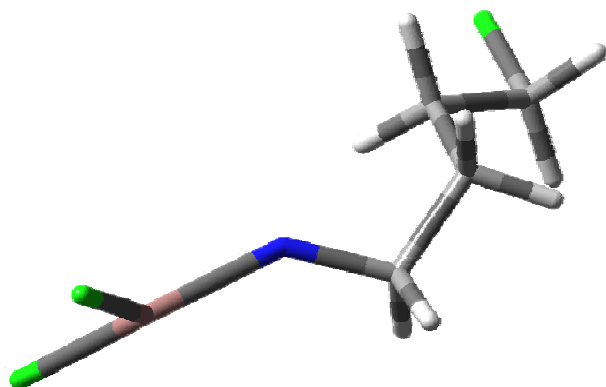

Sum of electronic and thermal Enthalpies = -258,604968 (Hartree/Particle)

1 imaginary frequencies (negative Signs): -87.8750  $\text{cm}^{-1}$

|    |             |             |             |
|----|-------------|-------------|-------------|
| C  | -4.53987800 | -0.41260500 | 0.29659600  |
| H  | -5.15011700 | -1.30692800 | 0.15306900  |
| H  | -4.54093900 | -0.11777200 | 1.34866700  |
| C  | -3.12911300 | -0.56300400 | -0.27486000 |
| H  | -3.19556700 | -0.78838000 | -1.34455600 |
| H  | -2.59583200 | 0.39191300  | -0.19670800 |
| C  | -2.33647100 | -1.67927000 | 0.47027500  |
| H  | -2.95636900 | -2.13746500 | 1.25727800  |
| H  | -2.07504600 | -2.48308900 | -0.22834500 |
| C  | -1.03779500 | -1.16891900 | 1.13725400  |
| H  | -1.28728500 | -0.38354000 | 1.87850700  |
| H  | -0.56789400 | -1.98086900 | 1.72129300  |
| N  | -0.10955500 | -0.60129500 | 0.17700500  |
| Cl | -5.47897400 | 0.96646700  | -0.59776500 |
| In | 1.74927700  | 0.04855200  | 0.07175200  |
| Cl | 2.24281600  | 2.34837600  | 0.26385300  |
| Cl | 3.45268300  | -1.33961100 | -0.79077500 |

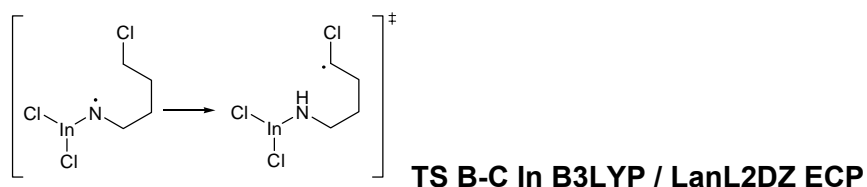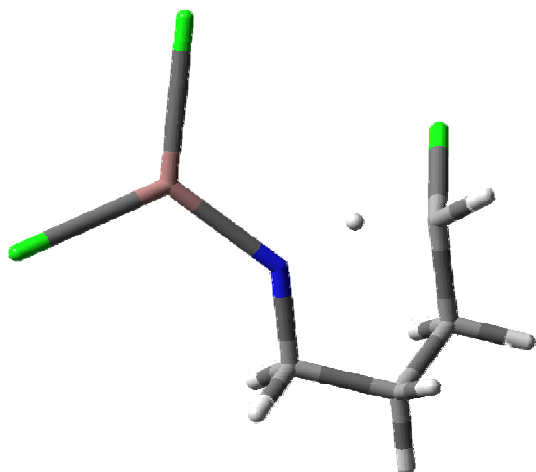

Sum of electronic and thermal Enthalpies = -258,594588 (Hartree/Particle)

1 imaginary frequencies (negative Signs): -1397.3997 cm<sup>-1</sup>

|    |             |             |             |
|----|-------------|-------------|-------------|
| C  | 2.81612800  | 0.26684700  | 0.44708300  |
| H  | 2.99457900  | 0.59927800  | 1.47209300  |
| C  | 3.44272100  | -1.06002000 | 0.04095700  |
| H  | 4.46013500  | -1.14804100 | 0.44873700  |
| H  | 3.52092900  | -1.11173900 | -1.05228600 |
| C  | 2.55388400  | -2.22635900 | 0.54917600  |
| H  | 2.99147100  | -3.18644900 | 0.24701800  |
| H  | 2.49619300  | -2.21286100 | 1.64583100  |
| C  | 1.12264900  | -2.10519000 | -0.03735000 |
| H  | 0.49952800  | -2.91302200 | 0.37847900  |
| H  | 1.16912500  | -2.25154500 | -1.12926400 |
| N  | 0.53178300  | -0.81064000 | 0.34691000  |
| Cl | 3.21115800  | 1.68314400  | -0.68213900 |
| H  | 1.57767300  | 0.02041300  | 0.39322400  |
| In | -1.19385100 | 0.03831700  | 0.02199600  |
| Cl | -3.11058700 | -1.25525200 | -0.49371600 |
| Cl | -1.54443600 | 2.32206300  | 0.47531400  |

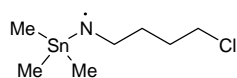

**A Sn B3LYP / LanL2DZ ECP**

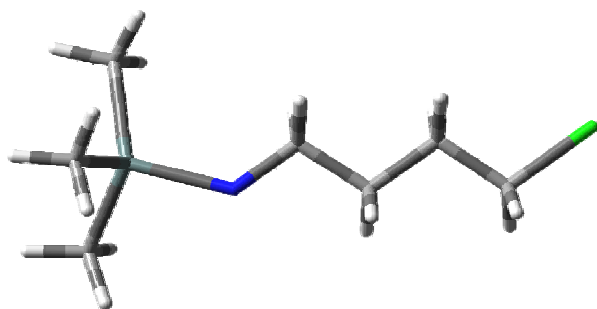

Sum of electronic and thermal Enthalpies = -349,729404 (Hartree/Particle)

|    |             |             |             |
|----|-------------|-------------|-------------|
| C  | 4.67325800  | -0.70150000 | -0.04610500 |
| H  | 4.80046400  | -1.38208100 | 0.79826100  |
| H  | 4.69599900  | -1.25425800 | -0.98760800 |
| C  | 3.43547600  | 0.18206200  | 0.08910600  |
| H  | 3.50762700  | 0.77007000  | 1.01452300  |
| H  | 3.40685100  | 0.89641000  | -0.74534100 |
| C  | 2.14176500  | -0.66848000 | 0.10355400  |
| H  | 2.06734500  | -1.26684600 | -0.81577100 |
| H  | 2.15156500  | -1.37676100 | 0.94324400  |
| C  | 0.87103500  | 0.20344400  | 0.22460200  |
| H  | 0.93177400  | 0.79464200  | 1.16175000  |
| H  | 0.85550200  | 0.95461700  | -0.59002700 |
| N  | -0.34164800 | -0.61391900 | 0.28399700  |
| Cl | 6.25320100  | 0.35046600  | -0.06327700 |
| Sn | -2.27593600 | 0.02604000  | -0.02012000 |
| C  | -3.03059300 | -1.29529500 | -1.52072000 |
| H  | -2.75876200 | -2.32782200 | -1.27124800 |
| H  | -4.12378200 | -1.22671100 | -1.58872900 |
| H  | -2.60678200 | -1.05388300 | -2.50319900 |
| C  | -2.41233100 | 2.07843200  | -0.64771500 |
| H  | -1.94536200 | 2.74532600  | 0.08838900  |
| H  | -1.91493700 | 2.22853400  | -1.61449900 |
| H  | -3.46528700 | 2.37153500  | -0.75580300 |

|   |             |             |            |
|---|-------------|-------------|------------|
| C | -3.25204600 | -0.27295800 | 1.85912400 |
| H | -4.33570100 | -0.12971500 | 1.76055200 |
| H | -3.06515100 | -1.29220900 | 2.21751800 |
| H | -2.87679500 | 0.43243900  | 2.61064300 |

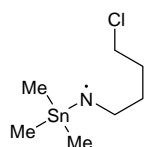

**B Sn B3LYP / LanL2DZ ECP**

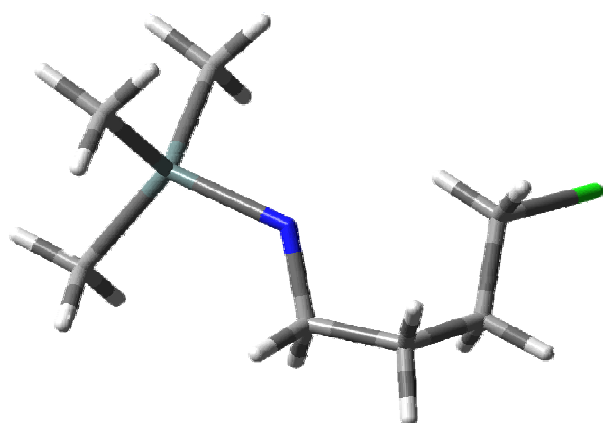

Sum of electronic and thermal Enthalpies = -258,60734 (Hartree/Particle)

|    |             |             |             |
|----|-------------|-------------|-------------|
| C  | -3.13976200 | -0.14999200 | 0.51909800  |
| H  | -2.20296900 | -0.69086900 | 0.40425600  |
| H  | -3.37501900 | -0.02288400 | 1.57763500  |
| C  | -3.17201200 | 1.17023400  | -0.25136300 |
| H  | -4.16788900 | 1.61941700  | -0.14023900 |
| H  | -3.02944500 | 0.97317500  | -1.32331700 |
| C  | -2.09738100 | 2.17498700  | 0.24116500  |
| H  | -2.35782700 | 3.17268000  | -0.14568000 |
| H  | -2.11710100 | 2.24001700  | 1.33856900  |
| C  | -0.65687000 | 1.84427800  | -0.20959000 |
| H  | 0.00080900  | 2.69705700  | 0.05582200  |
| H  | -0.62199800 | 1.79350800  | -1.31683500 |
| N  | -0.12170400 | 0.61747100  | 0.39038900  |
| Cl | -4.49603900 | -1.31686700 | -0.14009400 |
| Sn | 1.73099000  | -0.20418900 | -0.00543500 |



|   |            |             |             |
|---|------------|-------------|-------------|
| C | 1.33910400 | -2.28773700 | -0.25853000 |
| H | 0.77580000 | -2.47102700 | -1.18160000 |
| H | 2.27579000 | -2.85761000 | -0.30691800 |
| H | 0.74707500 | -2.66121200 | 0.58546700  |
| C | 2.67707700 | 0.63383300  | -1.74435600 |
| H | 2.81264300 | 1.71746000  | -1.63491400 |
| H | 3.66546500 | 0.17845100  | -1.89247200 |
| H | 2.07755700 | 0.44955700  | -2.64488600 |
| C | 2.88185700 | 0.18012900  | 1.75718900  |
| H | 2.32341800 | -0.13736000 | 2.64574900  |
| H | 3.83076800 | -0.37054800 | 1.72579500  |
| H | 3.10591400 | 1.24970600  | 1.85250800  |

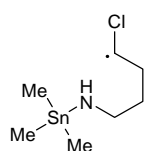

**C Sn B3LYP / LanL2DZ ECP**

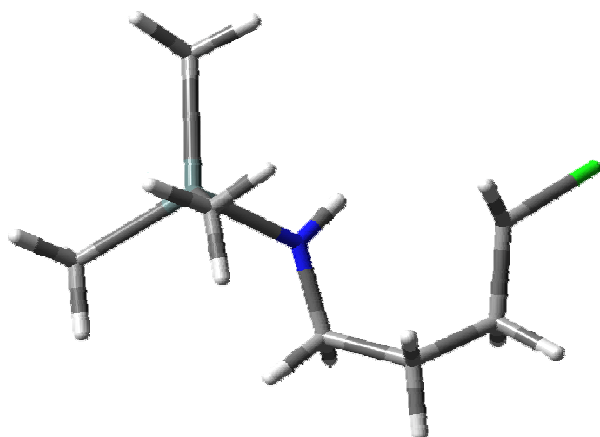

Sum of electronic and thermal Enthalpies = -349,728784 (Hartree/Particle)

|   |             |             |             |
|---|-------------|-------------|-------------|
| C | -3.09483600 | -0.21295000 | 0.34073000  |
| H | -2.55761500 | -0.63715200 | 1.18401000  |
| C | -3.17269800 | 1.25887600  | 0.06106100  |
| H | -3.96912700 | 1.70844800  | 0.68394400  |
| H | -3.48221800 | 1.42063400  | -0.98271900 |
| C | -1.84213400 | 2.00715000  | 0.33594300  |
| H | -2.05194000 | 3.08780800  | 0.29539700  |

|    |             |             |             |
|----|-------------|-------------|-------------|
| H  | -1.48839900 | 1.78274800  | 1.35271500  |
| C  | -0.70896000 | 1.68579900  | -0.67362900 |
| H  | 0.10746100  | 2.40412600  | -0.50450000 |
| H  | -1.08551300 | 1.89028800  | -1.69179900 |
| N  | -0.16172800 | 0.32203400  | -0.58379900 |
| Cl | -4.53782700 | -1.22898500 | -0.13146000 |
| Sn | 1.67606300  | -0.20660300 | 0.01109000  |
| C  | 1.80224700  | -2.30904000 | -0.35567300 |
| H  | 1.73441100  | -2.52004600 | -1.43020100 |
| H  | 2.75444300  | -2.71133900 | 0.01317600  |
| H  | 0.98815100  | -2.84162000 | 0.15236900  |
| C  | 3.12072100  | 0.90816400  | -1.11471500 |
| H  | 2.97512600  | 1.98766900  | -0.97752100 |
| H  | 4.14144200  | 0.65941500  | -0.79560000 |
| H  | 3.02502300  | 0.68292300  | -2.18412000 |
| C  | 1.93694300  | 0.24159000  | 2.09449400  |
| H  | 1.25665700  | -0.36408600 | 2.70673000  |
| H  | 2.96737600  | 0.03406300  | 2.41248100  |
| H  | 1.72615900  | 1.30093700  | 2.29264700  |
| H  | -0.81712400 | -0.39369100 | -0.88937500 |

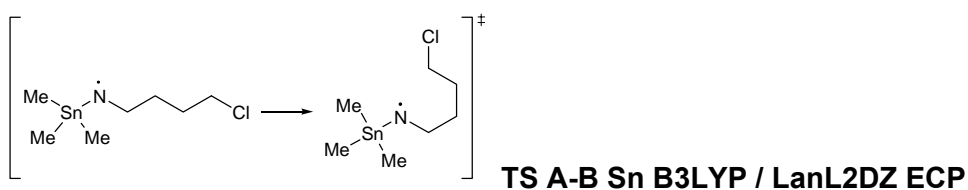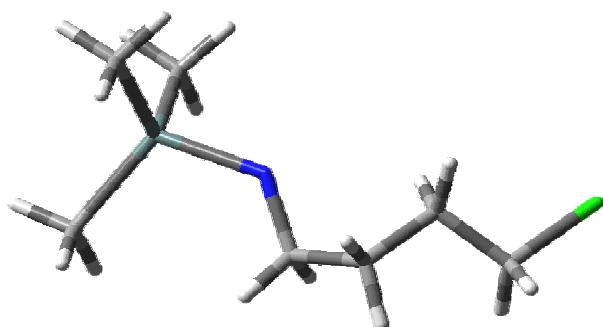

Sum of electronic and thermal Enthalpies = -349,726329 (Hartree/Particle)

1 imaginary frequencies (negative Signs): -88.8750 cm<sup>-1</sup>

|    |             |             |             |
|----|-------------|-------------|-------------|
| C  | 4.36857200  | -0.57588900 | -0.17803500 |
| H  | 4.92669900  | -1.35112800 | 0.35174200  |
| H  | 4.31912500  | -0.80578700 | -1.24506900 |
| C  | 2.99414800  | -0.31033000 | 0.43389500  |
| H  | 3.11321500  | -0.01822300 | 1.48276100  |
| H  | 2.51573300  | 0.53978000  | -0.06494200 |
| C  | 2.08103300  | -1.56791800 | 0.31541500  |
| H  | 2.60568100  | -2.38231700 | -0.21166100 |
| H  | 1.83999500  | -1.94906000 | 1.31564200  |
| C  | 0.75455200  | -1.28676400 | -0.43329700 |
| H  | 0.99335400  | -0.94355200 | -1.46123600 |
| H  | 0.19726400  | -2.23493600 | -0.56318200 |
| N  | -0.02493800 | -0.23120000 | 0.21296300  |
| Cl | 5.46983000  | 0.96739100  | -0.06825200 |
| Sn | -2.03505200 | 0.15596000  | -0.00062500 |
| C  | -2.12502800 | 2.12766100  | -0.82151100 |
| H  | -3.14968000 | 2.51842300  | -0.77877600 |
| H  | -1.47128100 | 2.79744600  | -0.25043800 |
| H  | -1.79607800 | 2.13241500  | -1.86786700 |
| C  | -2.78808200 | 0.09550100  | 1.99877500  |
| H  | -3.81894300 | 0.46984000  | 2.04013400  |
| H  | -2.77616100 | -0.92956600 | 2.38897200  |
| H  | -2.16233600 | 0.71944200  | 2.64787100  |
| C  | -3.05976400 | -1.25826100 | -1.25532200 |
| H  | -2.98109300 | -2.27499700 | -0.84951200 |
| H  | -4.12498600 | -0.99892900 | -1.32249900 |
| H  | -2.64304700 | -1.25807800 | -2.27066700 |

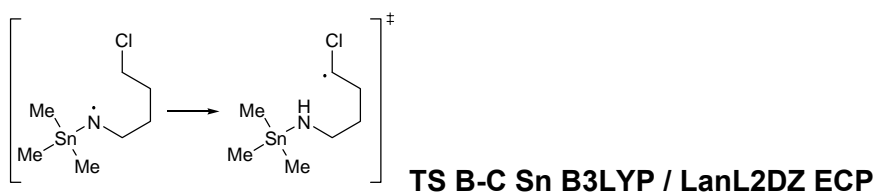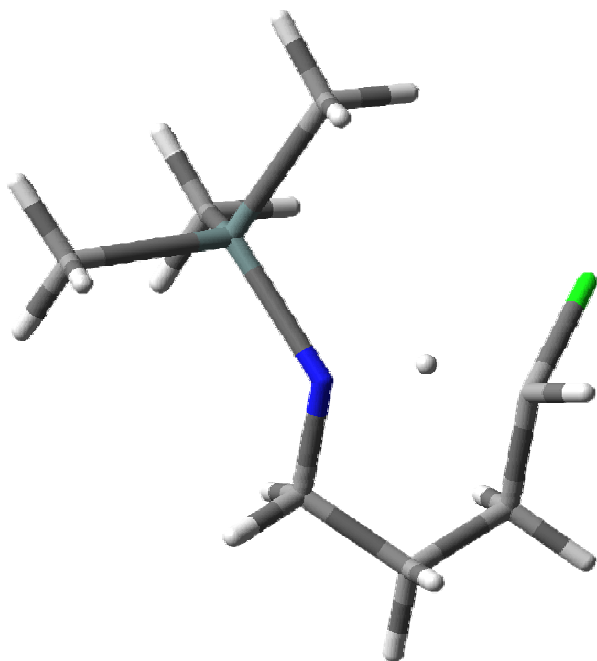

Sum of electronic and thermal Enthalpies = -349,712468 (Hartree/Particle)

1 imaginary frequencies (negative Signs): -1640.0300  $\text{cm}^{-1}$

|    |             |             |             |
|----|-------------|-------------|-------------|
| C  | 2.56922000  | -0.20111500 | -0.61990500 |
| H  | 2.92038900  | -0.30033800 | -1.65002900 |
| C  | 3.15846700  | 0.93406800  | 0.20431600  |
| H  | 4.23445200  | 1.05567200  | 0.00794500  |
| H  | 3.04369700  | 0.71237700  | 1.27312800  |
| C  | 2.39171400  | 2.24388100  | -0.13021200 |
| H  | 2.81216600  | 3.07982900  | 0.44485100  |
| H  | 2.50138300  | 2.48299900  | -1.19720600 |
| C  | 0.88619900  | 2.08070100  | 0.19917900  |
| H  | 0.35468500  | 2.99757300  | -0.10555200 |
| H  | 0.77640100  | 1.99039700  | 1.29721700  |
| N  | 0.31403300  | 0.93947600  | -0.55635700 |
| Cl | 2.70763300  | -1.88739300 | 0.17611000  |
| Sn | -1.36083200 | -0.10434900 | -0.00377000 |

|   |             |             |             |
|---|-------------|-------------|-------------|
| H | 1.28269400  | 0.17273700  | -0.74084100 |
| C | -1.30840500 | -0.68612000 | 2.06311200  |
| H | -2.19950800 | -1.27499100 | 2.31879400  |
| H | -0.42042800 | -1.29917200 | 2.26130100  |
| H | -1.27948300 | 0.19245400  | 2.72050300  |
| C | -1.39028200 | -1.79802100 | -1.29997600 |
| H | -0.51988700 | -2.43809400 | -1.11065000 |
| H | -2.29865100 | -2.39478100 | -1.14788100 |
| H | -1.36039500 | -1.47299000 | -2.34714900 |
| C | -2.99944500 | 1.22939900  | -0.35967800 |
| H | -2.95311700 | 1.61579300  | -1.38499000 |
| H | -3.95785600 | 0.71112400  | -0.22485500 |
| H | -2.96776800 | 2.07947000  | 0.33355300  |

*Cartesian coordinates and optimized geometries of all intermediates and transition states  
involved in 1,5-H shift of metal-aminyll radicals*

**Hartree-Fock - UF / LanL2DZ ECP**



**A In HF / LanL2DZ ECP**

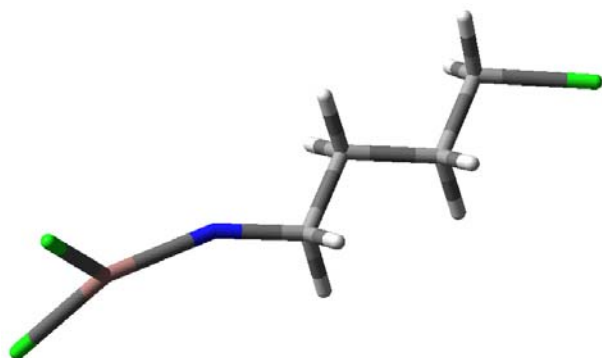

Sum of electronic and thermal Enthalpies = -256.368613 (Hartree/Particle)

|    |             |             |             |
|----|-------------|-------------|-------------|
| C  | -4.86158700 | 0.00016100  | 0.72255200  |
| H  | -4.86548200 | -0.88383500 | 1.33567000  |
| H  | -4.86545200 | 0.88446000  | 1.33523200  |
| C  | -3.73940900 | -0.00011300 | -0.30708700 |
| H  | -3.83985100 | -0.87209000 | -0.94305800 |
| H  | -3.83981200 | 0.87156100  | -0.94348000 |
| C  | -2.35853200 | 0.00002100  | 0.37476300  |
| H  | -2.25137000 | 0.87165300  | 1.01165500  |
| H  | -2.25140400 | -0.87130700 | 1.01207500  |
| C  | -1.21879800 | -0.00025300 | -0.65321100 |
| H  | -1.30027800 | -0.87128900 | -1.30036700 |
| H  | -1.30026300 | 0.87044400  | -1.30082000 |
| N  | 0.08968700  | -0.00014100 | -0.03079300 |
| In | 2.01292200  | -0.00000600 | -0.03641600 |
| Cl | 3.21674100  | 1.99274400  | 0.09525400  |
| Cl | 3.21705600  | -1.99255700 | 0.09536000  |
| Cl | -6.53245100 | -0.00002100 | -0.13349900 |

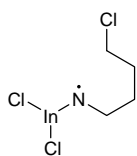

**B In HF / LanL2DZ ECP**

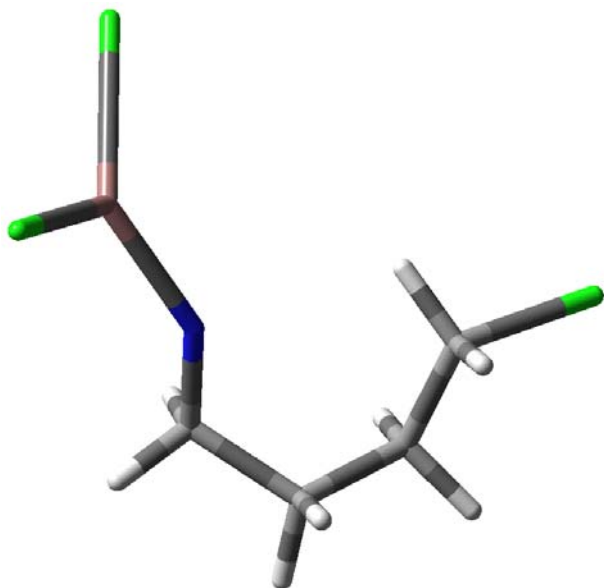

Sum of electronic and thermal Enthalpies = -256.366197 (Hartree/Particle)

|    |             |             |             |
|----|-------------|-------------|-------------|
| C  | 3.13098000  | 0.11392700  | 0.56389900  |
| H  | 2.30320900  | 0.73548700  | 0.28641500  |
| H  | 3.00022000  | -0.26504000 | 1.56174300  |
| C  | 3.44600800  | -0.98280900 | -0.44777000 |
| H  | 4.39098500  | -1.43640700 | -0.17564000 |
| H  | 3.58339400  | -0.53962000 | -1.42790500 |
| C  | 2.37533700  | -2.09103200 | -0.51657000 |
| H  | 2.78721200  | -2.90777000 | -1.10270000 |
| H  | 2.18241100  | -2.48429600 | 0.47616000  |
| C  | 1.03897300  | -1.68967600 | -1.15739500 |
| H  | 0.46957500  | -2.58735900 | -1.38631200 |
| H  | 1.21441500  | -1.18891300 | -2.10808500 |
| N  | 0.23010500  | -0.81216100 | -0.31958400 |
| In | -1.50260300 | 0.03221500  | -0.07226700 |
| Cl | -1.86886400 | 2.24504200  | -0.70760500 |
| Cl | -3.18767600 | -1.03046000 | 1.14003200  |
| Cl | 4.59404700  | 1.29589300  | 0.68530900  |



**C In HF / LanL2DZ ECP**

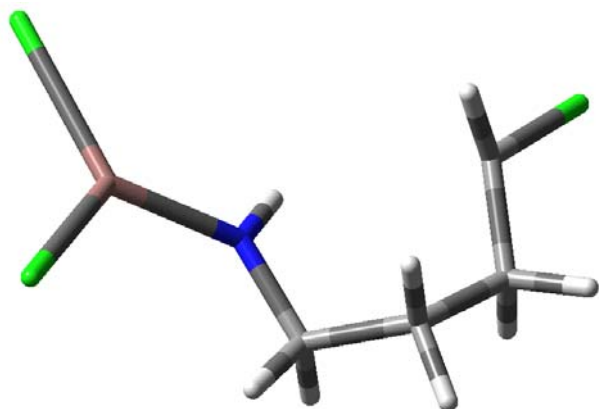

Sum of electronic and thermal Enthalpies = -256.370367 (Hartree/Particle)

|    |             |             |             |
|----|-------------|-------------|-------------|
| C  | -3.29246500 | 0.19744000  | -0.48165300 |
| H  | -2.79599800 | 0.52999900  | -1.37187600 |
| C  | -3.35482800 | -1.24571500 | -0.06363200 |
| H  | -4.12066500 | -1.74663900 | -0.65267400 |
| H  | -3.67942400 | -1.30740200 | 0.96962300  |
| C  | -2.01882500 | -1.99738400 | -0.23963500 |
| H  | -2.22649300 | -3.05922600 | -0.14660100 |
| H  | -1.63055300 | -1.84063200 | -1.24152100 |
| C  | -0.92890200 | -1.64241100 | 0.78771800  |
| H  | -0.13139300 | -2.36995300 | 0.69832200  |
| H  | -1.33452600 | -1.75037300 | 1.78977700  |
| N  | -0.35442100 | -0.29167900 | 0.63185100  |
| In | 1.43458500  | 0.14631800  | 0.10102900  |
| Cl | 2.19958400  | 2.34488500  | -0.05014200 |
| Cl | 2.93752800  | -1.55496500 | -0.45815700 |
| Cl | -4.74504600 | 1.21629100  | -0.09865000 |
| H  | -0.98963400 | 0.43921100  | 0.88292100  |



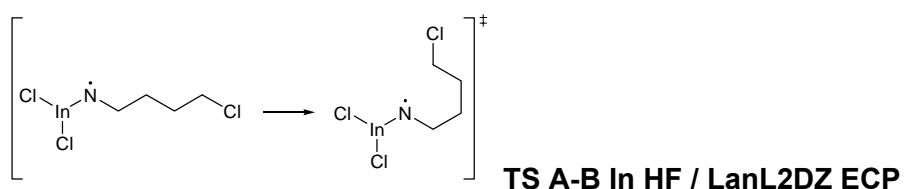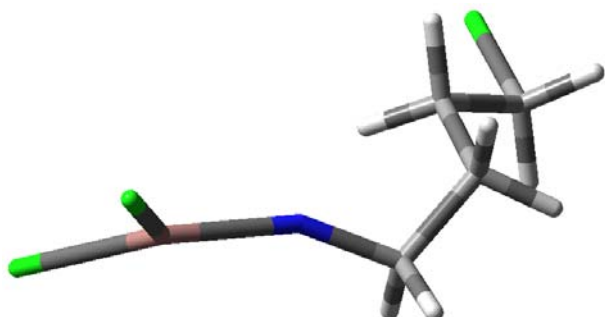

Sum of electronic and thermal Enthalpies = -256.364329 (Hartree/Particle)

1 imaginary frequencies (negative Signs): -97.4661  $\text{cm}^{-1}$

|    |             |             |             |
|----|-------------|-------------|-------------|
| C  | -4.46322300 | -0.41255000 | 0.22153300  |
| H  | -5.06219000 | -1.27508400 | -0.01286700 |
| H  | -4.53706800 | -0.17662500 | 1.26918500  |
| C  | -3.02125700 | -0.54673700 | -0.25596500 |
| H  | -3.01817300 | -0.70920600 | -1.32479400 |
| H  | -2.50038700 | 0.38636400  | -0.08832100 |
| C  | -2.29224100 | -1.70586200 | 0.47162100  |
| H  | -2.96836200 | -2.21591800 | 1.15425200  |
| H  | -1.96982200 | -2.44689200 | -0.24923600 |
| C  | -1.06722100 | -1.24831200 | 1.27867200  |
| H  | -1.36313600 | -0.50577000 | 2.01806300  |
| H  | -0.65638500 | -2.08812800 | 1.83329600  |
| N  | -0.03983600 | -0.65108500 | 0.44873700  |
| Cl | -5.31280700 | 1.01435700  | -0.65361100 |
| In | 1.70668900  | 0.05053000  | 0.06146900  |
| Cl | 2.19504500  | 2.31328600  | 0.33490900  |
| Cl | 3.34071900  | -1.29272400 | -0.91941000 |

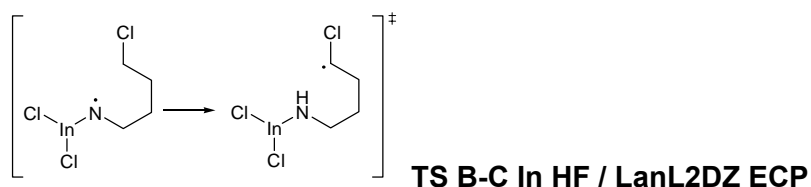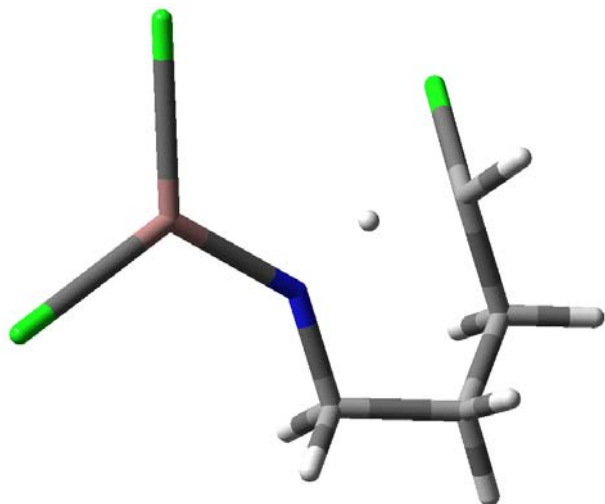

Sum of electronic and thermal Enthalpies = -256.324689 (Hartree/Particle)

1 imaginary frequencies (negative Signs): -2667.4752  $\text{cm}^{-1}$

|    |             |             |             |
|----|-------------|-------------|-------------|
| C  | 2.76582100  | 0.26388300  | 0.45392700  |
| H  | 2.82664300  | 0.62368700  | 1.46526800  |
| C  | 3.42280300  | -1.07451200 | 0.15935600  |
| H  | 4.37907200  | -1.14746800 | 0.66540900  |
| H  | 3.61110700  | -1.15929700 | -0.90296800 |
| C  | 2.47930400  | -2.21068000 | 0.60610700  |
| H  | 2.93439400  | -3.16970500 | 0.38787900  |
| H  | 2.31609700  | -2.16199600 | 1.67744300  |
| C  | 1.12415500  | -2.10993900 | -0.12047700 |
| H  | 0.45188600  | -2.87193300 | 0.25843100  |
| H  | 1.27099000  | -2.29793700 | -1.18024400 |
| N  | 0.52235600  | -0.78632600 | 0.10249500  |
| Cl | 3.27846500  | 1.63062300  | -0.66576000 |
| H  | 1.51967100  | 0.00738700  | 0.23721700  |
| In | -1.20174600 | 0.04682400  | 0.01545600  |
| Cl | -3.11254300 | -1.22413000 | -0.43301600 |
| Cl | -1.50906000 | 2.30966500  | 0.47073300  |

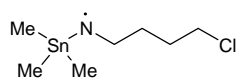

**A Sn HF / LanL2DZ ECP**

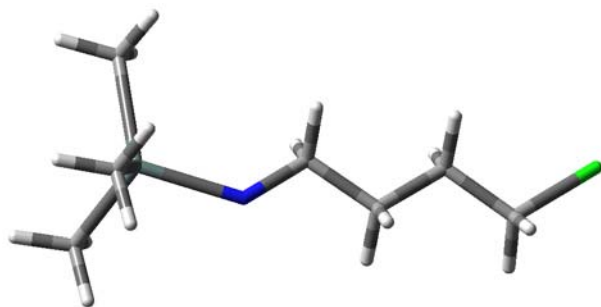

Sum of electronic and thermal Enthalpies = -346.993297 (Hartree/Particle)

|    |             |             |             |
|----|-------------|-------------|-------------|
| C  | 4.67733000  | -0.70271300 | -0.00001800 |
| H  | 4.74870000  | -1.31114300 | 0.88433200  |
| H  | 4.74860900  | -1.31110300 | -0.88440200 |
| C  | 3.45087100  | 0.19940100  | 0.00006500  |
| H  | 3.48153300  | 0.84296900  | 0.87199900  |
| H  | 3.48142600  | 0.84298400  | -0.87186200 |
| C  | 2.15238400  | -0.62932200 | 0.00014200  |
| H  | 2.11510700  | -1.27579300 | -0.87040700 |
| H  | 2.11518700  | -1.27576100 | 0.87071400  |
| C  | 0.89852900  | 0.25510800  | 0.00020300  |
| H  | 0.91303600  | 0.91219300  | 0.87079500  |
| H  | 0.91297300  | 0.91221600  | -0.87036700 |
| N  | -0.32349200 | -0.54549000 | 0.00030400  |
| Cl | 6.25293300  | 0.32641300  | -0.00007800 |
| Sn | -2.28541800 | 0.01628500  | -0.00001900 |
| C  | -3.09735800 | -0.84154100 | -1.76940200 |
| H  | -2.88642900 | -1.90501400 | -1.79517700 |
| H  | -4.17311400 | -0.70244800 | -1.81081400 |
| H  | -2.66151600 | -0.38684200 | -2.65303800 |
| C  | -2.51254100 | 2.14438900  | -0.00148300 |
| H  | -2.05207200 | 2.58465400  | 0.87762000  |
| H  | -2.05347700 | 2.58329400  | -0.88199900 |
| H  | -3.56489900 | 2.41336500  | -0.00084500 |

|   |             |             |            |
|---|-------------|-------------|------------|
| C | -3.09731800 | -0.83910400 | 1.77056800 |
| H | -4.17322100 | -0.70093500 | 1.81124300 |
| H | -2.88542700 | -1.90233700 | 1.79831800 |
| H | -2.66230500 | -0.38243100 | 2.65359400 |

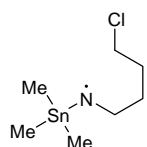

**B Sn HF / LanL2DZ ECP**

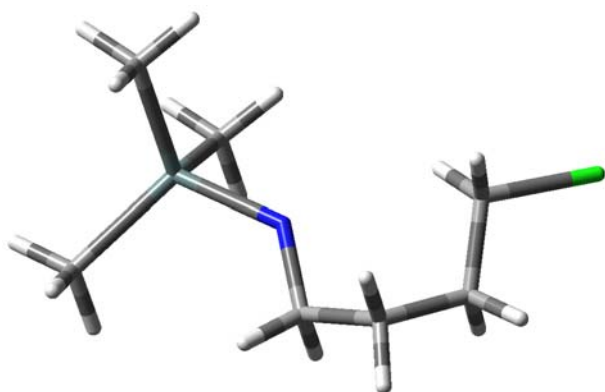

Sum of electronic and thermal Enthalpies = -346.992939 (Hartree/Particle)

|    |             |             |             |
|----|-------------|-------------|-------------|
| C  | -3.15497100 | -0.22521900 | 0.44117900  |
| H  | -2.30492200 | -0.80495300 | 0.14842500  |
| H  | -3.24351600 | -0.19393300 | 1.51264200  |
| C  | -3.20225200 | 1.15875900  | -0.19567300 |
| H  | -4.15795300 | 1.61229000  | 0.03902400  |
| H  | -3.15825300 | 1.06087600  | -1.27475200 |
| C  | -2.07531000 | 2.09381900  | 0.29281200  |
| H  | -2.34587300 | 3.11086000  | 0.01980400  |
| H  | -2.01649100 | 2.06701300  | 1.37686400  |
| C  | -0.68295200 | 1.80357300  | -0.28777000 |
| H  | -0.01362000 | 2.62211800  | -0.02319500 |
| H  | -0.73872000 | 1.80188500  | -1.37739600 |
| N  | -0.13822300 | 0.51384600  | 0.14035700  |
| Cl | -4.65841600 | -1.23053900 | -0.12506100 |
| Sn | 1.77116300  | -0.20518800 | 0.00114400  |

|   |            |             |             |
|---|------------|-------------|-------------|
| C | 1.65996300 | -1.81009600 | -1.39207000 |
| H | 1.40230600 | -1.44583900 | -2.38114100 |
| H | 2.61080500 | -2.32938800 | -1.45870400 |
| H | 0.90227200 | -2.52226200 | -1.08398200 |
| C | 3.13061400 | 1.30653900  | -0.66340400 |
| H | 3.14168600 | 2.14824100  | 0.02210000  |
| H | 4.13933100 | 0.90841100  | -0.72340900 |
| H | 2.85391700 | 1.67229500  | -1.64735900 |
| C | 2.24825400 | -0.85962500 | 1.96739100  |
| H | 1.49838400 | -1.56018700 | 2.31818300  |
| H | 3.21557100 | -1.35157700 | 1.98948600  |
| H | 2.27751900 | -0.02072600 | 2.65497100  |



**C Sn HF / LanL2DZ ECP**

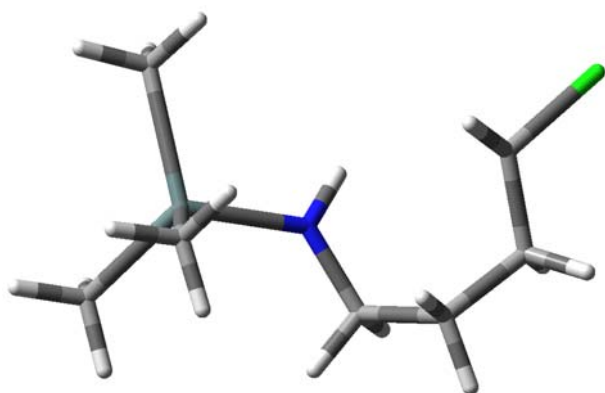

Sum of electronic and thermal Enthalpies = -346.988841 (Hartree/Particle)

|   |            |             |             |
|---|------------|-------------|-------------|
| C | 3.10121800 | 0.23903100  | 0.30097600  |
| H | 2.57756800 | 0.67533600  | 1.12762900  |
| C | 3.14831600 | -1.23944700 | 0.03348000  |
| H | 3.93640900 | -1.67934200 | 0.64220400  |
| H | 3.43411100 | -1.40825900 | -0.99990700 |
| C | 1.81914300 | -1.96206700 | 0.33644700  |
| H | 2.02110000 | -3.03035500 | 0.33155000  |

|    |             |             |             |
|----|-------------|-------------|-------------|
| H  | 1.47943000  | -1.70843800 | 1.33604800  |
| C  | 0.68128100  | -1.68344500 | -0.66561400 |
| H  | -0.11791700 | -2.39018500 | -0.46150500 |
| H  | 1.03361700  | -1.91355900 | -1.66968500 |
| N  | 0.12997700  | -0.32565900 | -0.61489100 |
| Cl | 4.60091200  | 1.18366000  | -0.12074400 |
| Sn | -1.68023700 | 0.20621700  | 0.01207600  |
| C  | -1.78993100 | 2.31617300  | -0.26109300 |
| H  | -1.67166900 | 2.57438700  | -1.30877200 |
| H  | -2.74866200 | 2.69951800  | 0.07446500  |
| H  | -1.00984500 | 2.81780400  | 0.30291100  |
| C  | -3.17079700 | -0.81356100 | -1.12923300 |
| H  | -3.08706900 | -1.88916300 | -1.00460700 |
| H  | -4.16778400 | -0.51619000 | -0.81726200 |
| H  | -3.06017300 | -0.58567900 | -2.18463100 |
| C  | -1.89747700 | -0.33441000 | 2.06791000  |
| H  | -1.15488200 | 0.17339500  | 2.67549000  |
| H  | -2.88272500 | -0.06573900 | 2.43750700  |
| H  | -1.77015200 | -1.40492200 | 2.20112200  |
| H  | 0.72462900  | 0.36430000  | -1.02670600 |

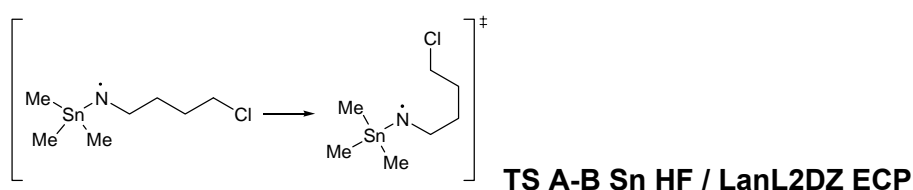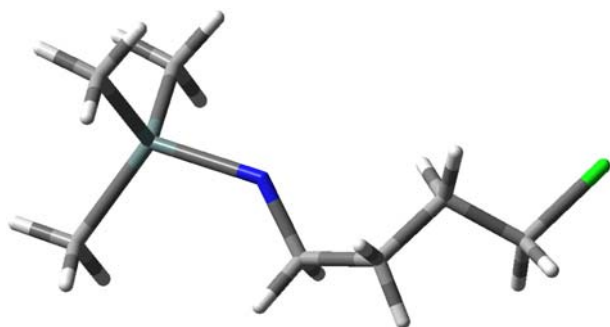

Sum of electronic and thermal Enthalpies = -346.989314 (Hartree/Particle)

1 imaginary frequencies (negative Signs): -99.1879 cm<sup>-1</sup>

|    |             |             |             |
|----|-------------|-------------|-------------|
| C  | 4.32461500  | -0.55519800 | -0.20214000 |
| H  | 4.91038400  | -1.32133100 | 0.27518000  |
| H  | 4.25678400  | -0.73722400 | -1.26097200 |
| C  | 2.96395200  | -0.35183100 | 0.45384600  |
| H  | 3.10580200  | -0.10168200 | 1.49591400  |
| H  | 2.46561600  | 0.49594300  | 0.00562900  |
| C  | 2.08249300  | -1.62026500 | 0.31478300  |
| H  | 2.62232700  | -2.40699000 | -0.21011800 |
| H  | 1.84803100  | -2.01106900 | 1.29738600  |
| C  | 0.76297600  | -1.35991600 | -0.42884500 |
| H  | 0.97605500  | -0.98887700 | -1.43262100 |
| H  | 0.22995300  | -2.30128200 | -0.56183100 |
| N  | -0.06039900 | -0.36821200 | 0.25921000  |
| Cl | 5.37158700  | 1.00240000  | -0.05456400 |
| Sn | -2.01258000 | 0.16615400  | 0.00366400  |
| C  | -1.94789200 | 2.15009000  | -0.76357900 |
| H  | -2.94443500 | 2.57711500  | -0.81658800 |
| H  | -1.33937300 | 2.77703200  | -0.12115200 |
| H  | -1.51838400 | 2.16545100  | -1.75994200 |
| C  | -2.86165400 | 0.06812000  | 1.95064800  |
| H  | -3.88102400 | 0.44118000  | 1.95075800  |
| H  | -2.87324100 | -0.95435700 | 2.31378100  |
| H  | -2.27552700 | 0.66634300  | 2.63956200  |
| C  | -3.02651800 | -1.15021600 | -1.34516500 |
| H  | -3.00841400 | -2.17181700 | -0.97808200 |
| H  | -4.06472600 | -0.85140300 | -1.45753700 |
| H  | -2.56286700 | -1.13278100 | -2.32673700 |

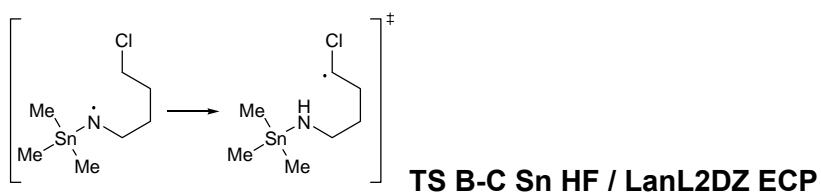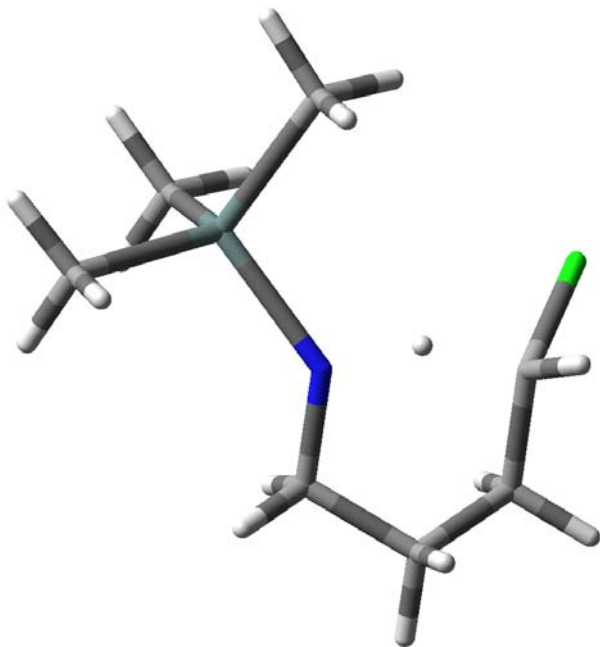

Sum of electronic and thermal Enthalpies = -346.945744 (Hartree/Particle)

1 imaginary frequencies (negative Signs): -2897.8662  $\text{cm}^{-1}$

|    |             |             |             |
|----|-------------|-------------|-------------|
| C  | 2.57379400  | -0.19995900 | -0.60617000 |
| H  | 2.80689400  | -0.30487900 | -1.65064000 |
| C  | 3.20510900  | 0.96570200  | 0.13487700  |
| H  | 4.23883800  | 1.10040700  | -0.16621400 |
| H  | 3.20187500  | 0.76382800  | 1.19852300  |
| C  | 2.38013500  | 2.24059300  | -0.14705700 |
| H  | 2.81925800  | 3.08201200  | 0.37775500  |
| H  | 2.39824200  | 2.46949000  | -1.20722300 |
| C  | 0.91876000  | 2.05073700  | 0.30122100  |
| H  | 0.34307100  | 2.93061500  | 0.03045200  |
| H  | 0.89466700  | 1.96673200  | 1.38835200  |
| N  | 0.32464400  | 0.88425200  | -0.37242700 |
| Cl | 2.83899200  | -1.85063500 | 0.19260300  |
| Sn | -1.39230500 | -0.11098300 | -0.01000800 |



|   |             |             |             |
|---|-------------|-------------|-------------|
| H | 1.27669200  | 0.11335200  | -0.56854000 |
| C | -1.50361900 | -0.75695400 | 2.02462800  |
| H | -2.42252800 | -1.30790300 | 2.20324600  |
| H | -0.66649500 | -1.40569300 | 2.26164700  |
| H | -1.48182200 | 0.09073800  | 2.70295200  |
| C | -1.37289800 | -1.75983500 | -1.35066100 |
| H | -0.54310100 | -2.42224200 | -1.12781200 |
| H | -2.29312700 | -2.33121000 | -1.27841100 |
| H | -1.26645700 | -1.41004500 | -2.37206800 |
| C | -2.95509900 | 1.27721500  | -0.42995300 |
| H | -2.85020000 | 1.66345000  | -1.43827300 |
| H | -3.92785300 | 0.80248400  | -0.34293000 |
| H | -2.92516000 | 2.11406300  | 0.26102100  |
